# Supplementary material for: Colombian Scorpion Centruroides margaritatus: Purification and Characterization of a Gamma Potassium Toxin with Full-Block Activity on the hERG1 Channel
Source: MDPI journal article supplement (doi:10.3390/toxins13060407), 2021-06-08
Supplement: s1 [file s1]

# Supplementary Materials: Colombian Scorpion *Centruroides margaritatus*: Purification and Characterization of a Gamma Potassium Toxin with Full-Block Activity on the hERG1 Channel

José Beltrán-Vidal, Edson Carcamo-Noriega, Nina Pastor, Fernando Zamudio-Zuñiga, Jimmy Alexander Guerrero-Vargas, Santiago Castaño, Lourival Domingos Possani and Rita Restano-Cassulini

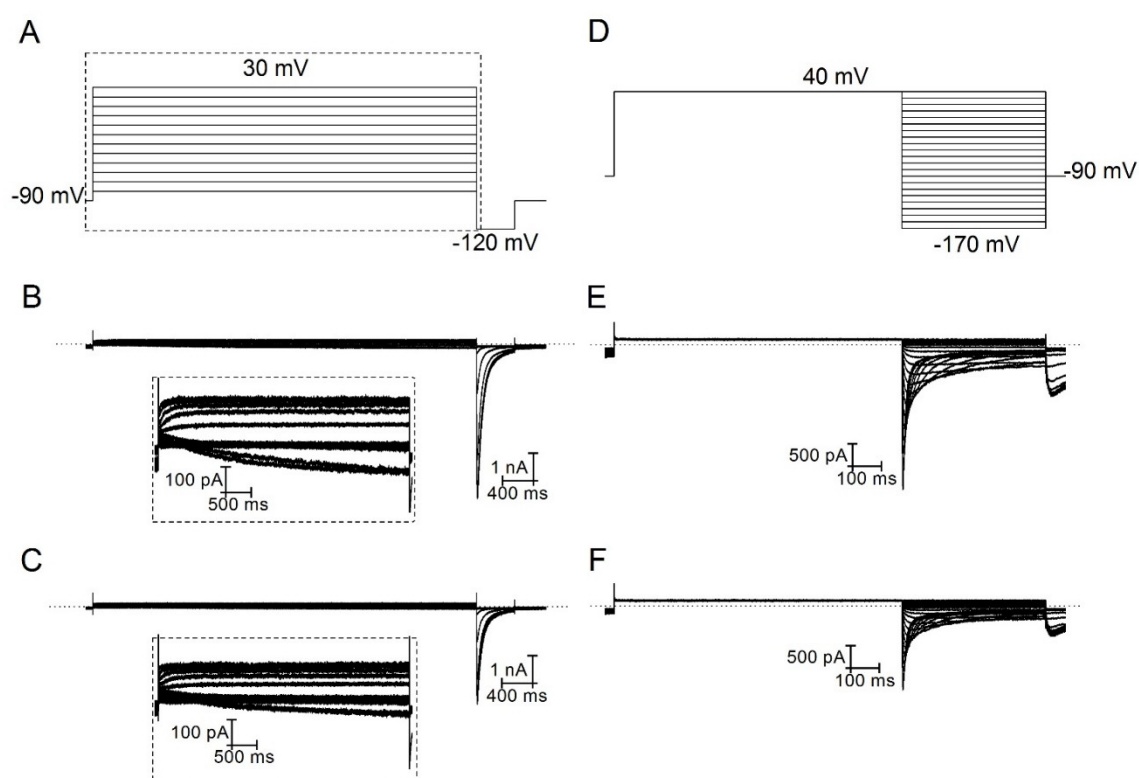

**Figure S1.** Whole hERG1 currents recorded during the activation and inactivation protocols depicted in A and D respectively, before (B and E) and after 1–2 min of 4 nM CmERG1 exposition (C and F). During the depolarization steps, the channels activate, but more quickly they inactivate resulting in a current considerably smaller if compared with the tail current recorded during the subsequent hyperpolarizing step. In the dash panels (B and C) the outwards currents are showed amplified. Currents in B–F are representative of  $n = 3$ .
